# Supplementary material
Source: PubMed Central journal article supplement (PMC8513810)
Supplement: NIHMS1738277-supplement-Supplemental_Material.pdf [file NIHMS1738277-supplement-Supplemental_Material.pdf]

## Supplementary Materials

for

### Lifetime and Perceived Stress, Social Support, Loneliness, and Health in Autistic Adults

#### Table of Contents

[Supplementary item 1: Scale reliability analysis](#)

[Supplementary item 2: Descriptive statistics for and correlations between STRAIN variables](#)

[Supplementary item 3: Descriptive statistics and correlations between moderating variables, STRAIN variables and outcome variables](#)

[Supplementary item 4: Relations between physical health, total life stressors, and social-psychological stressor types \(moderated mediation analysis\)](#)

[Supplementary item 5: Relations between mental health, total life stressors, and social-psychological stressor types \(moderated mediation analysis\)](#)

[Supplementary item 6: Moderating effects of loneliness and social support on the association between total stressor exposure and perceived stressor severity](#)

[Supplementary item 7: Moderating effects of loneliness and social support on the association between perceived stressor severity and physical health](#)

[Supplementary item 8: Moderating effects of loneliness and social support on the association between perceived stressor severity and mental health](#)

[Supplementary item 9: Post-hoc mediation analysis of loneliness, appraisal, belonging and tangible support on the association between Diagnosis and health outcomes](#)

Supplementary item 1: Scale reliability analysis

Alpha coefficients (Cronbach's  $\alpha$ ) for each scale were calculated separately for the autistic (AU) group and non-autistic adult (NA) comparison group, and within these, for men and women separately. The STRAIN has no presumed underlying factor, so was exempt from this analysis. As our analysis used only the total scores for the UCLA Loneliness Scale and the Physical Health Questionnaire (PHQ), we did not examine the internal consistency of the subscales in these tests. (The Kessler 6-item Psychological Distress Inventory [K6], incidentally, only consists of a single factor.) We did, however, examine internal consistency for each subscale of the Interpersonal Support Evaluation List-12 (ISEL-12), as these were used as separate variables in our analysis. We did not use the ISEL-12 total score, but provide the alpha coefficient for transparency.

As can be seen below, internal consistency was generally strong for each measure, for each participant group. The one exception was for the tangible support subscale (ISEL-12) when assessed in the small NA male group (shown in red). This is unsurprising given the size of the group and not concerning, given that the relevant part of the analysis did not stratify the AU and NA groups by sex. The relevant reliability coefficient, that for the whole AU and the whole NA group, remained in the acceptable range (.720) for this subscale.

|                                                           | <i>Non-autistic (NA) group</i> | <i>NA men</i> | <i>NA women</i> | <i>AU group</i> | <i>AU men</i> | <i>AU women</i> |
|-----------------------------------------------------------|--------------------------------|---------------|-----------------|-----------------|---------------|-----------------|
| UCLA Loneliness Scale: Total                              | .957                           | .958          | .957            | .937            | .954          | .929            |
| Interpersonal Support Evaluation List-12 (ISEL-12): Total | .884                           | .830          | .907            | .897            | .897          | .898            |
| Appraisal support                                         | .785                           | .704          | .821            | .808            | .786          | .821            |
| Belonging support                                         | .790                           | .745          | .813            | .804            | .793          | .812            |
| Tangible support                                          | .720                           | .485          | .810            | .767            | .807          | .751            |

|                                                      |      |      |      |      |      |      |
|------------------------------------------------------|------|------|------|------|------|------|
| Physical Health Questionnaire (PHQ)                  | .829 | .817 | .832 | .824 | .858 | .795 |
| Kessler 6-Item Psychological Distress Inventory (K6) | .891 | .895 | .888 | .845 | .866 | .842 |





|                                                                               |                                               |                                               |                                               |                                                |                                                |                                                |                    |
|-------------------------------------------------------------------------------|-----------------------------------------------|-----------------------------------------------|-----------------------------------------------|------------------------------------------------|------------------------------------------------|------------------------------------------------|--------------------|
| Work: <b>Exposure,</b><br><i>perceived severity</i>                           | <b>1.52 (1.70, 0-7)</b><br>4.31 (4.46, 0-16)  | <b>1.66 (1.85, 0-6)</b><br>4.59 (4.91, 0-15)  | <b>1.43 (1.60, 0-7)</b><br>4.13 (4.17, 0-16)  | <b>2.67 (2.11, 0-8)</b><br>9.18 (6.02, 0-20)   | <b>3.05 (2.59, 0-8)</b><br>9.27 (6.84, 0-20)   | <b>2.51 (1.87, 0-8)</b><br>9.14 (5.69, 0-20)   | <b>.60</b><br>.92  |
| Treatment/Health: <b>Exposure,</b><br><i>perceived severity</i>               | <b>2.57 (2.45, 0-11)</b><br>7.30 (6.76, 0-28) | <b>2.22 (2.21, 0-10)</b><br>6.51 (6.44, 0-28) | <b>2.79 (2.59, 0-11)</b><br>7.81 (6.96, 0-27) | <b>5.43 (3.43, 0-19)</b><br>16.62 (8.68, 0-45) | <b>4.65 (3.10, 0-14)</b><br>14.30 (8.89, 0-38) | <b>5.74 (3.52, 1-19)</b><br>17.58 (8.45, 3-45) | <b>.96</b><br>1.20 |
| Marital/partner: <b>Exposure,</b><br><i>perceived severity</i>                | <b>2.13 (2.20, 0-13)</b><br>6.71 (5.77, 0-23) | <b>2.15 (2.42, 0-12)</b><br>6.61 (6.02, 0-23) | <b>2.11 (2.06, 0-9)</b><br>6.78 (5.65, 0-20)  | <b>3.95 (3.54, 0-16)</b><br>10.93 (6.84, 0-25) | <b>3.97 (3.47, 0-14)</b><br>10.27 (7.40, 0-21) | <b>3.94 (3.59, 0-16)</b><br>11.20 (6.62, 0-25) | <b>.62</b><br>.67  |
| Reproduction: <b>Exposure,</b><br><i>perceived severity</i>                   | <b>.14 (.40, 0-2)</b><br>.50 (1.38, 0-5)      | <b>.02 (.16, 0-1)</b><br>.12 (.78, 0-5)       | <b>.22 (.49, 0-2)</b><br>.75 (1.62, 0-5)      | <b>.24 (.57, 0-3)</b><br>.80 (1.96, 0-10)      | <b>.08 (.28, 0-1)</b><br>.22 (.89, 0-5)        | <b>.30 (.64, 0-3)</b><br>1 (2.22, 0-10)        | <b>.20</b><br>.18  |
| Financial: <b>Exposure,</b><br><i>perceived severity</i>                      | <b>1.05 (1.18, 0-6)</b><br>3.27 (3.21, 0-10)  | <b>.95 (1.26, 0-6)</b><br>2.80 (3.10, 0-10)   | <b>1.11 (1.12, 0-6)</b><br>3.57 (3.28, 0-10)  | <b>1.23 (1.38, 0-6)</b><br>3.76 (3.25, 0-10)   | <b>1.59 (1.91, 0-6)</b><br>4.08 (3.82, 0-10)   | <b>1.08 (1.07, 0-6)</b><br>3.62 (3.00, 0-10)   | <b>.14</b><br>.15  |
| Legal/crime: <b>Exposure,</b><br><i>perceived severity</i>                    | <b>.15 (.57, 0-5)</b><br>.39 (1.18, 0-5)      | <b>.34 (.85, 0-5)</b><br>.80 (1.57, 0-5)      | <b>.03 (.18, 0-1)</b><br>.13 (.73, 0-5)       | <b>.39 (.85, 0-6)</b><br>1.19 (2.17, 0-9)      | <b>.76 (1.23, 0-6)</b><br>1.78 (2.38, 0-9)     | <b>.23 (.58, 0-4)</b><br>.94 (2.04, 0-9)       | <b>.33</b><br>.46  |
| Other relationships:<br><b>Exposure,</b><br><i>perceived severity</i>         | <b>3.07 (2.81, 0-15)</b><br>10.0 (7.77, 0-35) | <b>3.46 (3.34, 0-15)</b><br>9.54 (7.46, 0-35) | <b>2.81 (2.39, 0-9)</b><br>10.30 (8.02, 0-34) | <b>5.39 (3.59, 0-15)</b><br>17.13 (9.40, 0-44) | <b>4.27 (3.33, 0-12)</b><br>13.81 (8.41, 0-30) | <b>5.84 (3.61, 0-15)</b><br>18.49 (9.09, 3-44) | <b>.72</b><br>.83  |
| Death: <b>Exposure,</b><br><i>perceived severity</i>                          | <b>2.65 (2.15, 0-7)</b><br>5.00 (4.03, 0-15)  | <b>2.39 (1.83, 0-7)</b><br>4.61 (3.64, 0-15)  | <b>2.83 (2.33, 0-7)</b><br>5.25 (4.27, 0-15)  | <b>2.85 (2.21, 0-7)</b><br>5.39 (4.17, 0-15)   | <b>3.23 (2.18, 0-7)</b><br>6.19 (4.11, 0-15)   | <b>2.69 (2.21, 0-7)</b><br>5.07 (4.18, 0-15)   | <b>.09</b><br>.10  |
| Life-threatening situations:<br><b>Exposure,</b><br><i>perceived severity</i> | <b>1.64 (2.58, 0-16)</b><br>4.08 (5.06, 0-23) | <b>1.95 (3.42, 0-16)</b><br>4.10 (5.57, 0-23) | <b>1.44 (1.86, 0-9)</b><br>4.06 (4.74, 0-18)  | <b>4.63 (4.53, 0-19)</b><br>9.57 (7.36, 0-25)  | <b>5.00 (4.99, 0-19)</b><br>9.27 (6.93, 0-25)  | <b>4.48 (4.35, 0-18)</b><br>9.69 (7.57, 0-25)  | <b>.81</b><br>.87  |

|                                                            |                                           |                                           |                                          |                                          |                                            |                                           |                   |
|------------------------------------------------------------|-------------------------------------------|-------------------------------------------|------------------------------------------|------------------------------------------|--------------------------------------------|-------------------------------------------|-------------------|
| Possessions: <b>Exposure,</b><br><i>perceived severity</i> | <b>.38 (1.04, 0-5)</b><br>.60 (1.45, 0-5) | <b>.41 (1.14, 0-5)</b><br>.68 (1.54, 0-5) | <b>.35 (.97, 0-5)</b><br>.54 (1.40, 0-5) | <b>.39 (.89, 0-5)</b><br>.87 (1.71, 0-5) | <b>.62 (1.19, 0-5)</b><br>1.19 (1.94, 0-5) | <b>.30 (.73, 0-7)</b><br>.73 (1.59, 0-15) | <b>.01</b><br>.17 |
|------------------------------------------------------------|-------------------------------------------|-------------------------------------------|------------------------------------------|------------------------------------------|--------------------------------------------|-------------------------------------------|-------------------|

Moderated mediation and moderation analyses used the following STRAIN variables, which are displayed using the same colour key for coefficient values. Participants are pooled. As before, CT reflects stressor count, the number or frequency of each type of stressor; S reflects perceived severity of that stressor type or category. A single asterisk (\*) indicates correlations significant at  $p < .05$ ; double asterisks indicate correlations significant at  $p < .01$ ; triple asterisks indicate correlations significant at  $p < .001$ .

**Key:** correlation coefficients

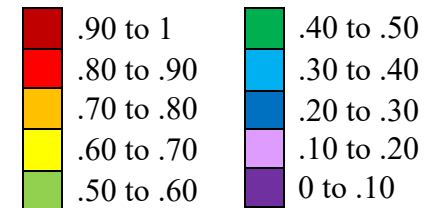

| Correlations between STRAIN variables: total stressor exposure and perception, and stressors categorised by social-psychological characteristics | Total stressors (CT) | Total stressors (S) | Interpersonal loss (CT) | Interpersonal loss (S) | Physical danger (CT) | Physical danger (S) | Humiliation (CT) | Humiliation (S) | Entrapment (CT) | Entrapment (S) | Role change/disruption (CT) | Role change/disruption (S) |
|--------------------------------------------------------------------------------------------------------------------------------------------------|----------------------|---------------------|-------------------------|------------------------|----------------------|---------------------|------------------|-----------------|-----------------|----------------|-----------------------------|----------------------------|
| Total stressors (CT)                                                                                                                             |                      |                     |                         |                        |                      |                     |                  |                 |                 |                |                             |                            |
| Total stressors (S)                                                                                                                              | ***                  |                     |                         |                        |                      |                     |                  |                 |                 |                |                             |                            |
| Interpersonal loss (CT)                                                                                                                          |                      |                     |                         |                        |                      |                     |                  |                 |                 |                |                             |                            |
| Interpersonal loss (S)                                                                                                                           |                      |                     | ***                     |                        |                      |                     |                  |                 |                 |                |                             |                            |
| Physical danger (CT)                                                                                                                             |                      |                     | ***                     | ***                    |                      |                     |                  |                 |                 |                |                             |                            |
| Physical danger (S)                                                                                                                              |                      |                     | ***                     | ***                    | ***                  |                     |                  |                 |                 |                |                             |                            |

|                             |  |     |     |     |     |     |     |     |     |     |  |  |  |
|-----------------------------|--|-----|-----|-----|-----|-----|-----|-----|-----|-----|--|--|--|
| Humiliation (CT)            |  | *** | *** | *** | *** |     |     |     |     |     |  |  |  |
| Humiliation (S)             |  | *** | *** | *** | *** | *** |     |     |     |     |  |  |  |
| Entrapment (CT)             |  | *** | *** | *** | *** | *** | *** |     |     |     |  |  |  |
| Entrapment (S)              |  | *** | *** | *** | *** | *** | *** | *** |     |     |  |  |  |
| Role change/disruption (CT) |  | *** | *** | *** | *** | *** | *** | *** | *** |     |  |  |  |
| Role change/disruption (S)  |  | *** | *** | *** | *** | *** | *** | *** | *** | *** |  |  |  |

Descriptive statistics for these variables are as follows. Averages are shown with SD in brackets and range in italics. Again, effect sizes (Cohen's *d*) for the magnitude of the difference between averages in the NA and AU groups are shown in the final column.

| Stressor types                        | NA group                    | NA men                      | NA women                    | AU group                    | AU men                      | AU women                     | <i>d</i><br>(NA / AU) |
|---------------------------------------|-----------------------------|-----------------------------|-----------------------------|-----------------------------|-----------------------------|------------------------------|-----------------------|
| Total lifetime stressors:             |                             |                             |                             |                             |                             |                              |                       |
| <b>Exposure</b>                       | <b>19.09 (12.98, 0-93)</b>  | <b>19.68 (16.33, 3-93)</b>  | <b>18.70 (10.37, 1-44)</b>  | <b>36.33 (19.45, 3-103)</b> | <b>35.62 (21.89, 3-92)</b>  | <b>36.62 (18.48, 6-103)</b>  | <b>1.04</b>           |
| <i>Perceived severity</i>             | <i>47.99 (30.23, 3-174)</i> | <i>46.34 (32.03, 6-174)</i> | <i>49.06 (29.22, 3-115)</i> | <i>89.04 (42.03, 4-223)</i> | <i>82.92 (44.32, 4-174)</i> | <i>91.56 (41.05, 13-223)</i> | <i>1.12</i>           |
| Social-psychological characteristics: |                             |                             |                             |                             |                             |                              |                       |
| Interpersonal loss:                   |                             |                             |                             |                             |                             |                              |                       |
| <b>Exposure,</b>                      | <b>5.05 (3.05, 0-18)</b>    | <b>4.83 (2.90, 1-18)</b>    | <b>5.19 (3.16, 0-12)</b>    | <b>7.06 (3.92, 0-17)</b>    | <b>7.08 (4.05, 0-15)</b>    | <b>7.04 (3.89, 0-17)</b>     | <b>.57</b>            |
| <i>Perceived severity</i>             | <i>12.97 (7.77, 0-39)</i>   | <i>12.51 (6.88, 3-39)</i>   | <i>13.27 (8.3, 0-35)</i>    | <i>18.36 (9.02, 0-40)</i>   | <i>17.57 (10.02, 0-40)</i>  | <i>18.69 (8.61, 0-40)</i>    | <i>.64</i>            |
| Physical danger:                      |                             |                             |                             |                             |                             |                              |                       |
| <b>Exposure,</b>                      | <b>3.47 (4.21, 0-26)</b>    | <b>3.54 (4.99, 0-26)</b>    | <b>3.43 (3.66, 0-18)</b>    | <b>8.38 (6.72, 0-34)</b>    | <b>8.41 (7.19, 0-29)</b>    | <b>8.37 (6.55, 1-34)</b>     | <b>.88</b>            |
| <i>Perceived severity</i>             | <i>7.99 (7.97, 0-33)</i>    | <i>7.61 (8.51, 0-33)</i>    | <i>8.24 (7.66, 0-28)</i>    | <i>20.23 (12.97, 0-59)</i>  | <i>18.43 (12.60, 0-50)</i>  | <i>20.97 (13.12, 2-59)</i>   | <i>1.17</i>           |



|                                                                             |                                                       |                                                        |                                                       |                                                        |                                                        |                                                        |                           |
|-----------------------------------------------------------------------------|-------------------------------------------------------|--------------------------------------------------------|-------------------------------------------------------|--------------------------------------------------------|--------------------------------------------------------|--------------------------------------------------------|---------------------------|
| Humiliation:<br><b>Exposure,</b><br><i>Perceived severity</i>               | <b>2.97 (3.26, 0-18)</b><br><i>8.06 (6.70, 0-30)</i>  | <b>3.63 (4.12, 0-18)</b><br><i>8.17 (6.95, 0-30)</i>   | <b>2.54 (2.50, 0-10)</b><br><i>7.98 (6.58, 0-30)</i>  | <b>5.97 (3.90, 0-19)</b><br><i>16.51 (7.69, 3-34)</i>  | <b>6.08 (4.64, 0-19)</b><br><i>15.95 (8.51, 3-34)</i>  | <b>5.92 (3.59, 0-15)</b><br><i>16.76 (7.37, 3-34)</i>  | <b>.83</b><br><i>1.17</i> |
| Entrapment:<br><b>Exposure,</b><br><i>Perceived severity</i>                | <b>2.03 (1.41, 0-5)</b><br><i>7.49 (5.75, 0-22)</i>   | <b>1.85 (1.30, 0-4)</b><br><i>6.83 (5.53, 0-19)</i>    | <b>2.14 (1.48, 0-5)</b><br><i>7.92 (5.90, 0-22)</i>   | <b>2.76 (1.65, 0-6)</b><br><i>11.52 (7.17, 0-30)</i>   | <b>2.35 (1.62, 0-6)</b><br><i>9.51 (7.26, 0-28)</i>    | <b>2.92 (1.64, 0-6)</b><br><i>12.34 (7.78, 0-30)</i>   | <b>.48</b><br><i>.62</i>  |
| Role<br>change/disruption:<br><b>Exposure,</b><br><i>Perceived severity</i> | <b>4.26 (4.11, 0-27)</b><br><i>11.48 (9.59, 0-53)</i> | <b>4.44 (5.00, 0-27)</b><br><i>11.22 (10.20, 0-53)</i> | <b>4.14 (3.46, 0-16)</b><br><i>11.65 (9.26, 0-35)</i> | <b>9.48 (6.77, 0-29)</b><br><i>22.41 (12.35, 0-65)</i> | <b>9.30 (7.80, 0-29)</b><br><i>21.46 (13.01, 0-49)</i> | <b>9.56 (6.35, 0-29)</b><br><i>22.80 (12.12, 0-65)</i> | <b>.93</b><br><i>.99</i>  |

Supplementary item 3: Descriptive statistics and correlations between moderating variables, STRAIN variables and outcome variables.

Descriptive statistics are depicted for all participants pooled, for autistic participants, and for the NA participants. Averages are given with SD in brackets and range in italics.

|                                           | ISEL-Appraisal support         | ISEL-Belonging support        | ISEL-Tangible support         | Loneliness                      | Physical health (PHQ)            | Mental health (K6)             |
|-------------------------------------------|--------------------------------|-------------------------------|-------------------------------|---------------------------------|----------------------------------|--------------------------------|
| All participants pooled ( <i>n</i> = 231) | 7.31<br>(3.03)<br><i>1-12</i>  | 5.75<br>(3.31)<br><i>1-12</i> | 7<br>(3.10)<br><i>1-12</i>    | 29.74<br>(15.61)<br><i>0-59</i> | 40.76<br>(13.73)<br><i>13-81</i> | 17.59<br>(6.42)<br><i>6-30</i> |
| Non-autistic (NA) group ( <i>n</i> = 104) | 8.59<br>(2.84),<br><i>1-12</i> | 7.30<br>(3.03)<br><i>1-12</i> | 8.41<br>(2.66)<br><i>1-11</i> | 20.22<br>(14.04)<br><i>0-54</i> | 36.36<br>(12.33)<br><i>13-75</i> | 14.33<br>(5.93)<br><i>6-30</i> |
| Autistic (AU) group ( <i>n</i> = 127)     | 6.26<br>(2.78)<br><i>1-12</i>  | 4.49<br>(2.98)<br><i>1-12</i> | 5.85<br>(2.96)<br><i>1-12</i> | 37.54<br>(12.14)<br><i>1-59</i> | 44.36<br>(13.80)<br><i>16-81</i> | 20.26<br>(5.52)<br><i>6-30</i> |

As the participants were pooled for this moderation analysis, correlation coefficients (*r*) are depicted for the whole group only. Triple asterisks reflect correlations that were significant at  $p < .001$ ; double asterisks reflect correlations significant at  $p = .01$ ; single asterisks reflect correlations significant at  $p = .05$ .

|                                   | ISEL-Appraisal support | ISEL-Belonging support | ISEL-Tangible support | Loneliness | Total stressor exposure | Total perceived stressor severity | Physical health (PHQ) | Mental health (K6) |
|-----------------------------------|------------------------|------------------------|-----------------------|------------|-------------------------|-----------------------------------|-----------------------|--------------------|
| ISEL-Appraisal support            |                        |                        |                       |            |                         |                                   |                       |                    |
| ISEL-Belonging support            | .64***                 |                        |                       |            |                         |                                   |                       |                    |
| ISEL-Tangible support             | .64***                 | .74***                 |                       |            |                         |                                   |                       |                    |
| Loneliness                        | -.69***                | -.72***                | -.64***               |            |                         |                                   |                       |                    |
| Total stressor exposure           | -.43***                | -.40***                | -.46***               | .52***     |                         |                                   |                       |                    |
| Total perceived stressor severity | -.41***                | -.43***                | -.44***               | .56***     | .95***                  |                                   |                       |                    |
| Physical health (PHQ)             | -.19**                 | -.25***                | -.21**                | .41***     | .38***                  | .43***                            |                       |                    |
| Mental health (K6)                | -.44***                | -.50***                | -.47***               | .69***     | .49***                  | .54***                            | .59***                |                    |

Supplementary item 4: Relations between physical health, total life stressors, and social-psychological stressor types (moderated mediation analysis)

i) Relation of total stressor exposure to physical health as mediated by perceived stressor severity (sex and current relationship status as covariates):

|                                                             | Relation to perceived stressor severity<br>(mediator) |          |          | Relation to physical health |          |          |
|-------------------------------------------------------------|-------------------------------------------------------|----------|----------|-----------------------------|----------|----------|
|                                                             | <i>b (SE)</i>                                         | <i>t</i> | <i>p</i> | <i>b (SE)</i>               | <i>t</i> | <i>p</i> |
| Total stressor exposure                                     | 2.15 (.10)                                            | 21.09    | < .001   |                             |          |          |
| Diagnosis (moderator)                                       | 10.07 (3.53)                                          | 2.86     | .0047    |                             |          |          |
| Interaction term 1<br>(Total stressor exposure x diagnosis) | -.15 (.12)                                            | -1.29    | NS       |                             |          |          |
| Sex (covariate)                                             | 5.70 (1.90)                                           | 3.01     | .0030    |                             |          |          |
| Current relationship (covariate)                            | -3.07 (1.92)                                          | -1.60    | NS       |                             |          |          |
| Model                                                       | $R^2 = .90, F(5, 221) = 411.73, p < .001$             |          |          |                             |          |          |
| Total stressor exposure                                     |                                                       |          |          | -.13 (.23)                  | -.56     | NS       |

|                                                                                                  |                             |                                          |                                   |       |
|--------------------------------------------------------------------------------------------------|-----------------------------|------------------------------------------|-----------------------------------|-------|
| Perceived stressor severity (mediator)                                                           |                             | .24 (.10)                                | 2.28                              | .0238 |
| Diagnosis (moderator)                                                                            |                             | 7.12 (3.45)                              | 2.06                              | .0403 |
| Interaction term 1 (Total stressor exposure x diagnosis)                                         |                             | .05 (.28)                                | .18                               | NS    |
| Interaction term 2 (Perceived stressor severity x diagnosis)                                     |                             | -.11 (.13)                               | -.87                              | NS    |
| Sex (covariate)                                                                                  |                             | 5.59 (1.74)                              | 3.22                              | .0015 |
| Current relationship (covariate)                                                                 |                             | 2.43                                     | 1.40                              | NS    |
| Model                                                                                            |                             | $R^2 = .25, F(7, 219) = 10.40, p < .001$ |                                   |       |
| <b>Conditional indirect effects of total stressor exposure on physical health - by moderator</b> |                             |                                          |                                   |       |
|                                                                                                  | <b>Indirect effect (SE)</b> | <b>LL (95%) CI (bootstrapped)</b>        | <b>UL (95%) CI (bootstrapped)</b> |       |
| Diagnosis: AU                                                                                    | .25 (.18)                   | -.12                                     | .59                               |       |
| Diagnosis: NA                                                                                    | .51 (.20)                   | .08                                      | .89                               |       |
| <b>Index of moderated mediation (difference between conditional indirect effects)</b>            |                             |                                          |                                   |       |

|           | <b>Indirect effect (SE)</b> | <b>LL (95%) CI<br/>(bootstrapped)</b> | <b>UL (95%) CI<br/>(bootstrapped)</b> |
|-----------|-----------------------------|---------------------------------------|---------------------------------------|
| Diagnosis | -.25 (.27)                  | -.77                                  | .27                                   |

- ii) Relations between social-psychological stressor types and physical health as mediated by perceived stressor severity (sex and current relationship status as covariates):

| <b>Interpersonal loss stressors</b>                      |                                                               |          |          |                                    |          |          |
|----------------------------------------------------------|---------------------------------------------------------------|----------|----------|------------------------------------|----------|----------|
|                                                          | <b>Relation to perceived stressor severity<br/>(mediator)</b> |          |          | <b>Relation to physical health</b> |          |          |
|                                                          | <i>b (SE)</i>                                                 | <i>t</i> | <i>p</i> | <i>b (SE)</i>                      | <i>t</i> | <i>p</i> |
| Stressor exposure                                        | 2.16 (.15)                                                    | 21.09    | < .001   |                                    |          |          |
| Diagnosis<br>(moderator)                                 | 2.87 (1.25)                                                   | 2.30     | .0226    |                                    |          |          |
| Interaction term 1<br>(Stressor exposure x<br>diagnosis) | -.25 (.18)                                                    | -1.36    | NS       |                                    |          |          |
| Sex (covariate)                                          | .61 (.65)                                                     | .94      | NS       |                                    |          |          |
| Current relationship<br>(covariate)                      | -.18 (.66)                                                    | -.28     | NS       |                                    |          |          |

|                                                                                                               |                                           |                                   |                                   |       |
|---------------------------------------------------------------------------------------------------------------|-------------------------------------------|-----------------------------------|-----------------------------------|-------|
| Model                                                                                                         | $R^2 = .74, F(5, 221) = 126.45, p < .001$ |                                   |                                   |       |
| Stressor exposure                                                                                             |                                           | -0.13 (.23)                       | -0.56                             | NS    |
| Perceived stressor severity (mediator)                                                                        |                                           | .57 (.30)                         | 1.90                              | .0594 |
| Diagnosis (moderator)                                                                                         |                                           | 6.81 (3.60)                       | 1.89                              | .0600 |
| Interaction term 1 (Stressor exposure x diagnosis)                                                            |                                           | .41 (.93)                         | .44                               | NS    |
| Interaction term 2 (Perceived stressor severity x diagnosis)                                                  |                                           | -.31 (.38)                        | -.82                              | NS    |
| Sex (covariate)                                                                                               |                                           | 6.03 (1.76)                       | 3.42                              | .0007 |
| Current relationship (covariate)                                                                              |                                           | 1.97 (1.79)                       | 1.10                              | NS    |
| Model                                                                                                         | $R^2 = .20, F(7, 219) = 7.85, p < .001$   |                                   |                                   |       |
| <b>Conditional indirect effects of interpersonal loss stressor exposure on physical health - by moderator</b> |                                           |                                   |                                   |       |
|                                                                                                               | <b>Indirect effect (SE)</b>               | <b>LL (95%) CI (bootstrapped)</b> | <b>UL (95%) CI (bootstrapped)</b> |       |
| Diagnosis: AU                                                                                                 | .50 (.54)                                 | -.54                              | 1.58                              |       |

|                                                                                       |                             |                                       |                                       |
|---------------------------------------------------------------------------------------|-----------------------------|---------------------------------------|---------------------------------------|
| Diagnosis: NA                                                                         | .51 (.20)                   | .09                                   | 2.43                                  |
| <b>Index of moderated mediation (difference between conditional indirect effects)</b> |                             |                                       |                                       |
|                                                                                       | <b>Indirect effect (SE)</b> | <b>LL (95%) CI<br/>(bootstrapped)</b> | <b>UL (95%) CI<br/>(bootstrapped)</b> |
| Diagnosis                                                                             | -.74 (.80)                  | -2.27                                 | .82                                   |

| <b>Physical danger stressors</b>                         |                                                               |          |          |                                    |          |          |
|----------------------------------------------------------|---------------------------------------------------------------|----------|----------|------------------------------------|----------|----------|
|                                                          | <b>Relation to perceived stressor severity<br/>(mediator)</b> |          |          | <b>Relation to physical health</b> |          |          |
|                                                          | <i>b (SE)</i>                                                 | <i>t</i> | <i>p</i> | <i>b (SE)</i>                      | <i>t</i> | <i>p</i> |
| Stressor exposure                                        | 1.66 (.13)                                                    | 12.96    | < .001   |                                    |          |          |
| Diagnosis<br>(moderator)                                 | 4.08 (1.07)                                                   | 3.80     | .0002    |                                    |          |          |
| Interaction term 1<br>(Stressor exposure x<br>diagnosis) | .00 (.15)                                                     | .03      | NS       |                                    |          |          |
| Sex (covariate)                                          | 1.59 (.77)                                                    | 2.07     | .0398    |                                    |          |          |
| Current relationship<br>(covariate)                      | -.68 (.78)                                                    | -.87     | NS       |                                    |          |          |



|                                                                                                            |                                           |                                   |                                   |       |
|------------------------------------------------------------------------------------------------------------|-------------------------------------------|-----------------------------------|-----------------------------------|-------|
| Model                                                                                                      | $R^2 = .82, F(5, 221) = 195.66, p < .001$ |                                   |                                   |       |
| Stressor exposure                                                                                          |                                           | - .89 (.59)                       | -1.51                             | NS    |
| Perceived stressor severity (mediator)                                                                     |                                           | 1.05 (.31)                        | 3.36                              | .0009 |
| Diagnosis (moderator)                                                                                      |                                           | 7.25 (3.60)                       | 1.89                              | .0600 |
| Interaction term 1 (Stressor exposure x diagnosis)                                                         |                                           | .35 (.67)                         | .52                               | NS    |
| Interaction term 2 (Perceived stressor severity x diagnosis)                                               |                                           | -.58 (.35)                        | -1.62                             | NS    |
| Sex (covariate)                                                                                            |                                           | 5.53 (1.73)                       | 3.19                              | .0016 |
| Current relationship (covariate)                                                                           |                                           | 1.97 (1.79)                       | 1.10                              | NS    |
| Model                                                                                                      | $R^2 = .24, F(7, 219) = 9.71, p < .001$   |                                   |                                   |       |
| <b>Conditional indirect effects of physical danger stressor exposure on physical health - by moderator</b> |                                           |                                   |                                   |       |
|                                                                                                            | <b>Indirect effect (SE)</b>               | <b>LL (95%) CI (bootstrapped)</b> | <b>UL (95%) CI (bootstrapped)</b> |       |
| Diagnosis: AU                                                                                              | .79 (.30)                                 | .22                               | 1.41                              |       |

|                                                                                       |                             |                                       |                                       |
|---------------------------------------------------------------------------------------|-----------------------------|---------------------------------------|---------------------------------------|
| Diagnosis: NA                                                                         | 1.74 (.60)                  | .69                                   | 3.07                                  |
| <b>Index of moderated mediation (difference between conditional indirect effects)</b> |                             |                                       |                                       |
|                                                                                       | <b>Indirect effect (SE)</b> | <b>LL (95%) CI<br/>(bootstrapped)</b> | <b>UL (95%) CI<br/>(bootstrapped)</b> |
| Diagnosis                                                                             | -.95 (.66)                  | -2.39                                 | .22                                   |

| <b>Humiliation stressors</b>                             |                                                               |          |          |                                    |          |          |
|----------------------------------------------------------|---------------------------------------------------------------|----------|----------|------------------------------------|----------|----------|
|                                                          | <b>Relation to perceived stressor severity<br/>(mediator)</b> |          |          | <b>Relation to physical health</b> |          |          |
|                                                          | <i>b (SE)</i>                                                 | <i>t</i> | <i>p</i> | <i>b (SE)</i>                      | <i>t</i> | <i>p</i> |
| Stressor exposure                                        | 1.62 (.14)                                                    | 11.85    | < .001   |                                    |          |          |
| Diagnosis<br>(moderator)                                 | 4.16 (.97)                                                    | 4.30     | < .001   |                                    |          |          |
| Interaction term 1<br>(Stressor exposure x<br>diagnosis) | -.07 (.17)                                                    | -.40     | NS       |                                    |          |          |
| Sex (covariate)                                          | 1.30 (.64)                                                    | 2.04     | .0429    |                                    |          |          |
| Current relationship<br>(covariate)                      | -.76 (.64)                                                    | -1.18    | NS       |                                    |          |          |

|                                                                                       |                                           |                                         |                                   |                                   |
|---------------------------------------------------------------------------------------|-------------------------------------------|-----------------------------------------|-----------------------------------|-----------------------------------|
| Model                                                                                 | $R^2 = .72, F(5, 221) = 115.74, p < .001$ |                                         |                                   |                                   |
| Stressor exposure                                                                     |                                           | 1.54 (.60)                              | 2.58                              | .0105                             |
| Perceived stressor severity (mediator)                                                |                                           | .03 (.29)                               | .12                               | NS                                |
| Diagnosis (moderator)                                                                 |                                           | 5.84 (3.28)                             | 1.78                              | .0759                             |
| Interaction term 1 (Stressor exposure x diagnosis)                                    |                                           | -.81 (.75)                              | -1.08                             | NS                                |
| Interaction term 2 (Perceived stressor severity x diagnosis)                          |                                           | .05 (.37)                               | .14                               | NS                                |
| Sex (covariate)                                                                       |                                           | 7.38 (1.76)                             | 4.20                              | < .001                            |
| Current relationship (covariate)                                                      |                                           | 1.92 (1.75)                             | 1.09                              | NS                                |
| Model                                                                                 |                                           | $R^2 = .23, F(7, 219) = 9.33, p < .001$ |                                   |                                   |
| <b>Conditional direct effects of humiliation stressor exposure on physical health</b> |                                           |                                         |                                   |                                   |
|                                                                                       | <b>Direct effect (SE)</b>                 | <b><i>p</i></b>                         | <b>LL (95%) CI (bootstrapped)</b> | <b>UL (95%) CI (bootstrapped)</b> |
| Diagnosis: AU                                                                         | 1.54 (.60)                                | .0105                                   | .36                               | 2.71                              |

|                                                                                                        |                             |    |                                       |                                       |
|--------------------------------------------------------------------------------------------------------|-----------------------------|----|---------------------------------------|---------------------------------------|
| Diagnosis: NA                                                                                          | .73 (.46)                   | NS | -.18                                  | 1.63                                  |
| <b>Conditional indirect effects of humiliation stressor exposure on physical health - by moderator</b> |                             |    |                                       |                                       |
|                                                                                                        | <b>Indirect effect (SE)</b> |    | <b>LL (95%) CI<br/>(bootstrapped)</b> | <b>UL (95%) CI<br/>(bootstrapped)</b> |
| Diagnosis: AU                                                                                          | .13 (.43)                   |    | -.75                                  | .97                                   |
| Diagnosis: NA                                                                                          | .06 (.62)                   |    | -.31                                  | 1.13                                  |
| <b>Index of moderated mediation (difference between conditional indirect effects)</b>                  |                             |    |                                       |                                       |
|                                                                                                        | <b>Indirect effect (SE)</b> |    | <b>LL (95%) CI<br/>(bootstrapped)</b> | <b>UL (95%) CI<br/>(bootstrapped)</b> |
| Diagnosis                                                                                              | .08 (.75)                   |    | -1.29                                 | 1.64                                  |

|                             |                                                               |          |          |                                    |          |          |
|-----------------------------|---------------------------------------------------------------|----------|----------|------------------------------------|----------|----------|
| <b>Entrapment stressors</b> |                                                               |          |          |                                    |          |          |
|                             | <b>Relation to perceived stressor severity<br/>(mediator)</b> |          |          | <b>Relation to physical health</b> |          |          |
|                             | <i>b (SE)</i>                                                 | <i>t</i> | <i>p</i> | <i>b (SE)</i>                      | <i>t</i> | <i>p</i> |
| Stressor exposure           | 3.90 (.13)                                                    | 29.64    | < .001   |                                    |          |          |
| Diagnosis<br>(moderator)    | -.41 (.47)                                                    | -.88     | NS       |                                    |          |          |

|                                                                    |                                           |       |       |                                                                                                                                                                                                           |       |       |
|--------------------------------------------------------------------|-------------------------------------------|-------|-------|-----------------------------------------------------------------------------------------------------------------------------------------------------------------------------------------------------------|-------|-------|
| Interaction term 1<br>(Stressor exposure x<br>diagnosis)           | .60 (.17)                                 | 3.62  | .0004 | <div style="border: 1px dashed red; padding: 5px; color: red;">           NA group: b = 3.90 (.13), t = 29.64, p &lt; .001<br/>           AU group: b = 4.50 (.10), t = 43.88, p &lt; .001         </div> |       |       |
| Sex (covariate)                                                    | .11 (.27)                                 | .40   | NS    |                                                                                                                                                                                                           |       |       |
| Current relationship<br>(covariate)                                | -.29 (.27)                                | -1.09 | NS    |                                                                                                                                                                                                           |       |       |
| Model                                                              | $R^2 = .93, F(5, 221) = 633.93, p < .001$ |       |       |                                                                                                                                                                                                           |       |       |
| Stressor exposure                                                  |                                           |       |       | -3.63 (3.09)                                                                                                                                                                                              | -1.17 | NS    |
| Perceived stressor<br>severity (mediator)                          |                                           |       |       | 1.49 (.76)                                                                                                                                                                                                | 1.96  | .0511 |
| Diagnosis<br>(moderator)                                           |                                           |       |       | 8.05 (3.17)                                                                                                                                                                                               | 2.54  | .0118 |
| Interaction term 1<br>(Stressor exposure x<br>diagnosis)           |                                           |       |       | -.97 (4.03)                                                                                                                                                                                               | -.24  | NS    |
| Interaction term 2<br>(Perceived stressor<br>severity x diagnosis) |                                           |       |       | -.16 (.94)                                                                                                                                                                                                | -.17  | NS    |
| Sex (covariate)                                                    |                                           |       |       | 5.51 (1.77)                                                                                                                                                                                               | 3.12  | .0021 |
| Current relationship<br>(covariate)                                |                                           |       |       | 1.95 (1.79)                                                                                                                                                                                               | 1.09  | NS    |

|                                                                                                       |                             |                                       |                                       |                                         |
|-------------------------------------------------------------------------------------------------------|-----------------------------|---------------------------------------|---------------------------------------|-----------------------------------------|
| Model                                                                                                 |                             |                                       |                                       | $R^2 = .20, F(7, 219) = 8.00, p < .001$ |
| <b>Conditional indirect effects of entrapment stressor exposure on physical health - by moderator</b> |                             |                                       |                                       |                                         |
|                                                                                                       | <b>Indirect effect (SE)</b> | <b>LL (95%) CI<br/>(bootstrapped)</b> | <b>UL (95%) CI<br/>(bootstrapped)</b> |                                         |
| Diagnosis: AU                                                                                         | 5.98 (3.45)                 | -.22                                  | 13.33                                 |                                         |
| Diagnosis: NA                                                                                         | 5.80 (3.35)                 | -.68                                  | 12.47                                 |                                         |
| <b>Index of moderated mediation (difference between conditional indirect effects)</b>                 |                             |                                       |                                       |                                         |
|                                                                                                       | <b>Indirect effect (SE)</b> | <b>LL (95%) CI<br/>(bootstrapped)</b> | <b>UL (95%) CI<br/>(bootstrapped)</b> |                                         |
| Diagnosis                                                                                             | .18 (4.78)                  | -8.96                                 | 9.73                                  |                                         |

|                                         |                                                               |          |          |                                    |          |          |
|-----------------------------------------|---------------------------------------------------------------|----------|----------|------------------------------------|----------|----------|
| <b>Role change/disruption stressors</b> |                                                               |          |          |                                    |          |          |
|                                         | <b>Relation to perceived stressor severity<br/>(mediator)</b> |          |          | <b>Relation to physical health</b> |          |          |
|                                         | <i>b (SE)</i>                                                 | <i>t</i> | <i>p</i> | <i>b (SE)</i>                      | <i>t</i> | <i>p</i> |
| Stressor exposure                       | 2.14 (.11)                                                    | 18.83    | < .001   |                                    |          |          |
| Diagnosis<br>(moderator)                | 4.92 (1.01)                                                   | 4.87     | < .001   |                                    |          |          |

|                                                                    |                                                                                                                                                                                                    |       |       |                                                                                                                                                                                                            |       |       |             |       |       |
|--------------------------------------------------------------------|----------------------------------------------------------------------------------------------------------------------------------------------------------------------------------------------------|-------|-------|------------------------------------------------------------------------------------------------------------------------------------------------------------------------------------------------------------|-------|-------|-------------|-------|-------|
| Interaction term 1<br>(Stressor exposure x<br>diagnosis)           | -.51 (.13)                                                                                                                                                                                         | -3.95 | .0001 | <div style="border: 1px dashed red; padding: 5px; color: red;">           NA group: b = 2.14 (.11), t = .18.83, p &lt; .001<br/>           AU group: b = 1.63 (.06), t = 25.94, p &lt; .001         </div> |       |       |             |       |       |
| Sex (covariate)                                                    | .87 (.67)                                                                                                                                                                                          | 1.31  | NS    |                                                                                                                                                                                                            |       |       |             |       |       |
| Current relationship<br>(covariate)                                | -1.25 (.68)                                                                                                                                                                                        | -1.86 | .0647 |                                                                                                                                                                                                            |       |       |             |       |       |
| Model                                                              | $R^2 = .86, F(5, 221) = 271.68, p < .001$                                                                                                                                                          |       |       |                                                                                                                                                                                                            |       |       |             |       |       |
| Stressor exposure                                                  | <div style="border: 1px dashed red; padding: 5px; color: red;">           NA group: b = -1.81 (.74), t = -2.44, p = .0153<br/>           AU group: b = -.18 (.36), t = -.48, p = NS         </div> |       |       | -1.81 (.74)                                                                                                                                                                                                | -2.44 | .0153 |             |       |       |
| Perceived stressor<br>severity (mediator)                          |                                                                                                                                                                                                    |       |       | 1.22 (.32)                                                                                                                                                                                                 | 3.86  | .0001 |             |       |       |
| Diagnosis<br>(moderator)                                           |                                                                                                                                                                                                    |       |       | 5.79 (3.04)                                                                                                                                                                                                | 1.90  | .0584 |             |       |       |
| Interaction term 1<br>(Stressor exposure x<br>diagnosis)           |                                                                                                                                                                                                    |       |       | 1.63 (.82)                                                                                                                                                                                                 | 1.98  | .0488 |             |       |       |
| Interaction term 2<br>(Perceived stressor<br>severity x diagnosis) |                                                                                                                                                                                                    |       |       | <div style="border: 1px dashed red; padding: 5px; color: red;">           NA group: b = 1.22 (.32), t = 3.86, p = .0001<br/>           AU group: b = .40 (.20), t = 1.99, p = .0469         </div>         |       |       | -0.82 (.37) | -2.19 | .0295 |
| Sex (covariate)                                                    |                                                                                                                                                                                                    |       |       | 5.71 (1.71)                                                                                                                                                                                                | 3.35  | .0010 |             |       |       |
| Current relationship<br>(covariate)                                |                                                                                                                                                                                                    |       |       | 2.13 (1.73)                                                                                                                                                                                                | 1.23  | NS    |             |       |       |

|                                                                                                                   |                             |                                       |                                       |                                          |  |
|-------------------------------------------------------------------------------------------------------------------|-----------------------------|---------------------------------------|---------------------------------------|------------------------------------------|--|
| Model                                                                                                             |                             |                                       |                                       | $R^2 = .25, F(7, 219) = 10.68, p < .001$ |  |
| <b>Conditional direct effects of role change/disruption stressor exposure on physical health</b>                  |                             |                                       |                                       |                                          |  |
|                                                                                                                   | <b>Direct effect (SE)</b>   | <i>p</i>                              | <b>LL (95%) CI<br/>(bootstrapped)</b> | <b>UL (95%) CI<br/>(bootstrapped)</b>    |  |
| Diagnosis: AU                                                                                                     | -0.18 (.36)                 | NS                                    | -0.89                                 | 0.54                                     |  |
| Diagnosis: NA                                                                                                     | -1.81 (.74)                 | .0153                                 | -3.26                                 | -0.35                                    |  |
| <b>Conditional indirect effects of role change/disruption stressor exposure on physical health - by moderator</b> |                             |                                       |                                       |                                          |  |
|                                                                                                                   | <b>Indirect effect (SE)</b> | <b>LL (95%) CI<br/>(bootstrapped)</b> | <b>UL (95%) CI<br/>(bootstrapped)</b> |                                          |  |
| Diagnosis: AU                                                                                                     | .66 (.38)                   | -0.09                                 | 1.41                                  |                                          |  |
| Diagnosis: NA                                                                                                     | 2.61 (.69)                  | 1.36                                  | 4.07                                  |                                          |  |
| <b>Index of moderated mediation (difference between conditional indirect effects)</b>                             |                             |                                       |                                       |                                          |  |
|                                                                                                                   | <b>Indirect effect (SE)</b> | <b>LL (95%) CI<br/>(bootstrapped)</b> | <b>UL (95%) CI<br/>(bootstrapped)</b> |                                          |  |
| Diagnosis                                                                                                         | -1.96 (.79)                 | -3.60                                 | -0.53                                 |                                          |  |



Supplementary item 5: Relations between mental health, total life stressors, and social-psychological stressor types (moderated mediation analysis)

i) Relation of total stressor exposure to mental health as mediated by perceived stressor severity (sex and current relationship status as covariates):

|                                                             | Relation to perceived stressor severity<br>(mediator) |          |          | Relation to mental health |          |          |
|-------------------------------------------------------------|-------------------------------------------------------|----------|----------|---------------------------|----------|----------|
|                                                             | <i>b (SE)</i>                                         | <i>t</i> | <i>p</i> | <i>b (SE)</i>             | <i>t</i> | <i>p</i> |
| Total stressor exposure                                     | 2.16 (.10)                                            | 21.09    | < .001   |                           |          |          |
| Diagnosis (moderator)                                       | 10.07 (3.53)                                          | 2.86     | .0047    |                           |          |          |
| Interaction term 1<br>(Total stressor exposure x diagnosis) | -.15 (.12)                                            | -1.29    | NS       |                           |          |          |
| Sex (covariate)                                             | 5.70 (1.90)                                           | 3.01     | .0030    |                           |          |          |
| Current relationship (covariate)                            | -3.07 (1.92)                                          | -1.59    | NS       |                           |          |          |
| Model                                                       | $R^2 = .90, F(5, 221) = 411.73, p < .001$             |          |          |                           |          |          |
| Total stressor exposure                                     |                                                       |          |          | -.04 (.10)                | -.42     | NS       |

|                                                                                                |                             |                                          |                                   |        |
|------------------------------------------------------------------------------------------------|-----------------------------|------------------------------------------|-----------------------------------|--------|
| Perceived stressor severity (mediator)                                                         |                             | .13 (.04)                                | 2.92                              | .0038  |
| Diagnosis (moderator)                                                                          |                             | 6.81 (1.45)                              | 4.68                              | < .001 |
| Interaction term 1 (Total stressor exposure x diagnosis)                                       |                             | -.03 (.12)                               | -.24                              | NS     |
| Interaction term 2 (Perceived stressor severity x diagnosis)                                   |                             | -.05 (.05)                               | -1.03                             | NS     |
| Sex (covariate)                                                                                |                             | .63 (.73)                                | .86                               | NS     |
| Current relationship (covariate)                                                               |                             | 1.43 (.73)                               | 1.96                              | .0581  |
| Model                                                                                          |                             | $R^2 = .39, F(7, 219) = 19.83, p < .001$ |                                   |        |
| <b>Conditional indirect effects of total stressor exposure on mental health - by moderator</b> |                             |                                          |                                   |        |
|                                                                                                | <b>Indirect effect (SE)</b> | <b>LL (95%) CI (bootstrapped)</b>        | <b>UL (95%) CI (bootstrapped)</b> |        |
| Diagnosis: AU                                                                                  | .15 (.10)                   | .00                                      | .27                               |        |
| Diagnosis: NA                                                                                  | .27 (.07)                   | .08                                      | .46                               |        |
| <b>Index of moderated mediation (difference between conditional indirect effects)</b>          |                             |                                          |                                   |        |

|           | <b>Indirect effect (SE)</b> | <b>LL (95%) CI<br/>(bootstrapped)</b> | <b>UL (95%) CI<br/>(bootstrapped)</b> |
|-----------|-----------------------------|---------------------------------------|---------------------------------------|
| Diagnosis | -.13 (.12)                  | -.37                                  | .10                                   |

- ii) Relations between social-psychological stressor types and mental health as mediated by perceived stressor severity (sex and current relationship status as covariates):

| <b>Interpersonal loss stressors</b>                      |                                                               |          |          |                                  |          |          |
|----------------------------------------------------------|---------------------------------------------------------------|----------|----------|----------------------------------|----------|----------|
|                                                          | <b>Relation to perceived stressor severity<br/>(mediator)</b> |          |          | <b>Relation to mental health</b> |          |          |
|                                                          | <i>b (SE)</i>                                                 | <i>t</i> | <i>p</i> | <i>b (SE)</i>                    | <i>t</i> | <i>p</i> |
| Stressor exposure                                        | 2.16 (.15)                                                    | 21.09    | < .001   |                                  |          |          |
| Diagnosis<br>(moderator)                                 | 2.87 (1.25)                                                   | 2.30     | .0226    |                                  |          |          |
| Interaction term 1<br>(Stressor exposure x<br>diagnosis) | -.25 (.18)                                                    | -1.36    | NS       |                                  |          |          |
| Sex (covariate)                                          | .61 (.65)                                                     | .94      | NS       |                                  |          |          |
| Current relationship<br>(covariate)                      | -.18 (.66)                                                    | -.28     | NS       |                                  |          |          |
| Model                                                    | $R^2 = .74, F(5, 221) = 126.45, p < .001$                     |          |          |                                  |          |          |

|                                                                                                             |                             |                                          |                                   |       |
|-------------------------------------------------------------------------------------------------------------|-----------------------------|------------------------------------------|-----------------------------------|-------|
| Stressor exposure                                                                                           |                             | -0.09 (.34)                              | -0.25                             | NS    |
| Perceived stressor severity (mediator)                                                                      |                             | .28 (.13)                                | 2.12                              | .0350 |
| Diagnosis (moderator)                                                                                       |                             | 6.08 (1.59)                              | 3.84                              | .0002 |
| Interaction term 1 (Stressor exposure x diagnosis)                                                          |                             | -.12 (.41)                               | -.29                              | NS    |
| Interaction term 2 (Perceived stressor severity x diagnosis)                                                |                             | -.06 (.17)                               | -.37                              | NS    |
| Sex (covariate)                                                                                             |                             | .80 (.78)                                | 1.03                              | NS    |
| Current relationship (covariate)                                                                            |                             | .98 (.79)                                | 1.25                              | NS    |
| Model                                                                                                       |                             | $R^2 = .28, F(7, 219) = 12.66, p < .001$ |                                   |       |
| <b>Conditional indirect effects of interpersonal loss stressor exposure on mental health - by moderator</b> |                             |                                          |                                   |       |
|                                                                                                             | <b>Indirect effect (SE)</b> | <b>LL (95%) CI (bootstrapped)</b>        | <b>UL (95%) CI (bootstrapped)</b> |       |
| Diagnosis: AU                                                                                               | .43 (.20)                   | .06                                      | .83                               |       |
| Diagnosis: NA                                                                                               | .61 (.29)                   | .05                                      | 1.21                              |       |

| Index of moderated mediation (difference between conditional indirect effects) |                      |                               |                               |
|--------------------------------------------------------------------------------|----------------------|-------------------------------|-------------------------------|
|                                                                                | Indirect effect (SE) | LL (95%) CI<br>(bootstrapped) | UL (95%) CI<br>(bootstrapped) |
| Diagnosis                                                                      | -.19 (.35)           | -.89                          | .51                           |

| Physical danger stressors                                |                                                       |          |          |                           |          |          |
|----------------------------------------------------------|-------------------------------------------------------|----------|----------|---------------------------|----------|----------|
|                                                          | Relation to perceived stressor severity<br>(mediator) |          |          | Relation to mental health |          |          |
|                                                          | <i>b (SE)</i>                                         | <i>t</i> | <i>p</i> | <i>b (SE)</i>             | <i>t</i> | <i>p</i> |
| Stressor exposure                                        | 1.66 (.13)                                            | 12.96    | < .001   |                           |          |          |
| Diagnosis<br>(moderator)                                 | 4.08 (1.07)                                           | 3.80     | .0002    |                           |          |          |
| Interaction term 1<br>(Stressor exposure x<br>diagnosis) | .00 (.15)                                             | .03      | NS       |                           |          |          |
| Sex (covariate)                                          | 1.59 (.77)                                            | 2.07     | .0398    |                           |          |          |
| Current relationship<br>(covariate)                      | -.68 (.78)                                            | -.87     | NS       |                           |          |          |
| Model                                                    | $R^2 = .82, F(5, 221) = 195.66, p < .001$             |          |          |                           |          |          |

|                                                                                                          |                                                                                                                                                                                                                    |                                         |                                   |        |
|----------------------------------------------------------------------------------------------------------|--------------------------------------------------------------------------------------------------------------------------------------------------------------------------------------------------------------------|-----------------------------------------|-----------------------------------|--------|
| Stressor exposure                                                                                        |                                                                                                                                                                                                                    | - .33 (.26)                             | -1.30                             | NS     |
| Perceived stressor severity (mediator)                                                                   |                                                                                                                                                                                                                    | .50 (.14)                               | 3.64                              | .0003  |
| Diagnosis (moderator)                                                                                    |                                                                                                                                                                                                                    | 5.90 (1.17)                             | 5.04                              | < .001 |
| Interaction term 1 (Stressor exposure x diagnosis)                                                       |                                                                                                                                                                                                                    | .38 (.29)                               | 1.29                              | NS     |
| Interaction term 2 (Perceived stressor severity x diagnosis)                                             | <div style="border: 1px dashed red; padding: 5px; color: red; text-align: center;">           NA group: b = .50 (.14), t = 3.64, p = .0003<br/>           AU group: b = .10 (.07), t = 1.39, p = NS         </div> | -.39 (.15)                              | -2.55                             | .0113  |
| Sex (covariate)                                                                                          |                                                                                                                                                                                                                    | .82 (.75)                               | 1.10                              | NS     |
| Current relationship (covariate)                                                                         |                                                                                                                                                                                                                    | 1.11 (.75)                              | 1.47                              | NS     |
| Model                                                                                                    |                                                                                                                                                                                                                    | $R^2 = .24, F(7, 219) = 9.71, p < .001$ |                                   |        |
| <b>Conditional indirect effects of physical danger stressor exposure on mental health - by moderator</b> |                                                                                                                                                                                                                    |                                         |                                   |        |
|                                                                                                          | <b>Indirect effect (SE)</b>                                                                                                                                                                                        | <b>LL (95%) CI (bootstrapped)</b>       | <b>UL (95%) CI (bootstrapped)</b> |        |
| Diagnosis: AU                                                                                            | .17 (.14)                                                                                                                                                                                                          | -.11                                    | .42                               |        |
| Diagnosis: NA                                                                                            | .82 (.26)                                                                                                                                                                                                          | .41                                     | 1.45                              |        |

| <b>Index of moderated mediation (difference between conditional indirect effects)</b> |                             |                                       |                                       |
|---------------------------------------------------------------------------------------|-----------------------------|---------------------------------------|---------------------------------------|
|                                                                                       | <b>Indirect effect (SE)</b> | <b>LL (95%) CI<br/>(bootstrapped)</b> | <b>UL (95%) CI<br/>(bootstrapped)</b> |
| Diagnosis                                                                             | -0.65 (.29)                 | -1.35                                 | -.19                                  |

| <b>Humiliation stressors</b>                             |                                                               |          |          |                                  |          |          |
|----------------------------------------------------------|---------------------------------------------------------------|----------|----------|----------------------------------|----------|----------|
|                                                          | <b>Relation to perceived stressor severity<br/>(mediator)</b> |          |          | <b>Relation to mental health</b> |          |          |
|                                                          | <i>b (SE)</i>                                                 | <i>t</i> | <i>p</i> | <i>b (SE)</i>                    | <i>t</i> | <i>p</i> |
| Stressor exposure                                        | 1.62 (.14)                                                    | 11.85    | < .001   |                                  |          |          |
| Diagnosis<br>(moderator)                                 | 4.16 (.97)                                                    | 4.30     | < .001   |                                  |          |          |
| Interaction term 1<br>(Stressor exposure x<br>diagnosis) | -.07 (.17)                                                    | -.40     | NS       |                                  |          |          |
| Sex (covariate)                                          | 1.30 (.64)                                                    | 2.04     | .0429    |                                  |          |          |
| Current relationship<br>(covariate)                      | -.76 (.64)                                                    | -1.18    | NS       |                                  |          |          |
| Model                                                    | $R^2 = .72, F(5, 221) = 115.74, p < .001$                     |          |          |                                  |          |          |

|                                                                                     |                           |                                          |                                   |                                   |
|-------------------------------------------------------------------------------------|---------------------------|------------------------------------------|-----------------------------------|-----------------------------------|
| Stressor exposure                                                                   |                           | .45 (.25)                                | 1.79                              | .0746                             |
| Perceived stressor severity (mediator)                                              |                           | .27 (.12)                                | 2.24                              | .0261                             |
| Diagnosis (moderator)                                                               |                           | 5.68 (1.38)                              | 4.12                              | .0001                             |
| Interaction term 1 (Stressor exposure x diagnosis)                                  |                           | -.07 (.31)                               | -.22                              | NS                                |
| Interaction term 2 (Perceived stressor severity x diagnosis)                        |                           | -.21 (.16)                               | -1.36                             | NS                                |
| Sex (covariate)                                                                     |                           | 1.41 (.74)                               | 1.90                              | .0586                             |
| Current relationship (covariate)                                                    |                           | 1.28 (.74)                               | 1.73                              | .0846                             |
| Model                                                                               |                           | $R^2 = .37, F(7, 219) = 18.58, p < .001$ |                                   |                                   |
| <b>Conditional direct effects of humiliation stressor exposure on mental health</b> |                           |                                          |                                   |                                   |
|                                                                                     | <b>Direct effect (SE)</b> | <b><i>p</i></b>                          | <b>LL (95%) CI (bootstrapped)</b> | <b>UL (95%) CI (bootstrapped)</b> |
| Diagnosis: AU                                                                       | .38 (.19)                 | .0496                                    | .00                               | .76                               |
| Diagnosis: NA                                                                       | .45 (.25)                 | .0746                                    | -.05                              | .94                               |



| <b>Conditional indirect effects of humiliation stressor exposure on mental health - by moderator</b> |                             |                                       |                                       |
|------------------------------------------------------------------------------------------------------|-----------------------------|---------------------------------------|---------------------------------------|
|                                                                                                      | <b>Indirect effect (SE)</b> | <b>LL (95%) CI<br/>(bootstrapped)</b> | <b>UL (95%) CI<br/>(bootstrapped)</b> |
| Diagnosis: AU                                                                                        | .10 (.15)                   | -.20                                  | .38                                   |
| Diagnosis: NA                                                                                        | .44 (.23)                   | -.04                                  | .88                                   |
| <b>Index of moderated mediation (difference between conditional indirect effects)</b>                |                             |                                       |                                       |
|                                                                                                      | <b>Indirect effect (SE)</b> | <b>LL (95%) CI<br/>(bootstrapped)</b> | <b>UL (95%) CI<br/>(bootstrapped)</b> |
| Diagnosis                                                                                            | -.35 (.27)                  | -.86                                  | .20                                   |

| <b>Entrapment stressors</b> |                                                               |          |          |                                  |          |          |
|-----------------------------|---------------------------------------------------------------|----------|----------|----------------------------------|----------|----------|
|                             | <b>Relation to perceived stressor severity<br/>(mediator)</b> |          |          | <b>Relation to mental health</b> |          |          |
|                             | <i>b (SE)</i>                                                 | <i>t</i> | <i>p</i> | <i>b (SE)</i>                    | <i>t</i> | <i>p</i> |
| Stressor exposure           | 3.90 (.13)                                                    | 29.64    | < .001   |                                  |          |          |
| Diagnosis<br>(moderator)    | -.41 (.47)                                                    | -.88     | NS       |                                  |          |          |
| Interaction term 1          | .60 (.17)                                                     | 3.62     | .0004    |                                  |          |          |

|                                                              |                                           |       |    |                                          |
|--------------------------------------------------------------|-------------------------------------------|-------|----|------------------------------------------|
| (Stressor exposure x diagnosis)                              |                                           |       |    |                                          |
| Sex (covariate)                                              | .11 (.27)                                 | .40   | NS |                                          |
| Current relationship (covariate)                             | -.29 (.27)                                | -1.09 | NS |                                          |
| Model                                                        | $R^2 = .93, F(5, 221) = 633.93, p < .001$ |       |    |                                          |
| Stressor exposure                                            |                                           |       |    | -1.21 (1.33)                             |
| Perceived stressor severity (mediator)                       |                                           |       |    | -.91                                     |
| Diagnosis (moderator)                                        |                                           |       |    | NS                                       |
| Interaction term 1 (Stressor exposure x diagnosis)           |                                           |       |    | .71 (.33)                                |
| Interaction term 2 (Perceived stressor severity x diagnosis) |                                           |       |    | 2.19                                     |
| Sex (covariate)                                              |                                           |       |    | .0299                                    |
| Current relationship (covariate)                             |                                           |       |    | 7.76 (1.37)                              |
| Model                                                        |                                           |       |    | 5.68                                     |
|                                                              |                                           |       |    | < .001                                   |
|                                                              |                                           |       |    | -1.36 (1.74)                             |
|                                                              |                                           |       |    | -.78                                     |
|                                                              |                                           |       |    | NS                                       |
|                                                              |                                           |       |    | -.04 (.41)                               |
|                                                              |                                           |       |    | .78                                      |
|                                                              |                                           |       |    | NS                                       |
|                                                              |                                           |       |    | .59 (.76)                                |
|                                                              |                                           |       |    | 1.42                                     |
|                                                              |                                           |       |    | NS                                       |
|                                                              |                                           |       |    | 1.09 (.77)                               |
|                                                              |                                           |       |    | 1.42                                     |
|                                                              |                                           |       |    | NS                                       |
|                                                              |                                           |       |    | $R^2 = .32, F(7, 219) = 14.70, p < .001$ |

| <b>Conditional direct effect of entrapment stressor exposure on mental health</b>                   |                             |                                       |                                       |                                       |
|-----------------------------------------------------------------------------------------------------|-----------------------------|---------------------------------------|---------------------------------------|---------------------------------------|
|                                                                                                     | <b>Direct effect (SE)</b>   | <b><i>p</i></b>                       | <b>LL (95%) CI<br/>(bootstrapped)</b> | <b>UL (95%) CI<br/>(bootstrapped)</b> |
| Diagnosis: AU                                                                                       | -2.58 (1.12)                | .0218                                 | -4.78                                 | -.38                                  |
| Diagnosis: NA                                                                                       | -1.21 (1.33)                | NS                                    | -3.84                                 | 1.42                                  |
| <b>Conditional indirect effects of entrapment stressor exposure on mental health - by moderator</b> |                             |                                       |                                       |                                       |
|                                                                                                     | <b>Indirect effect (SE)</b> | <b>LL (95%) CI<br/>(bootstrapped)</b> | <b>UL (95%) CI<br/>(bootstrapped)</b> |                                       |
| Diagnosis: AU                                                                                       | 3.03 (1.04)                 | 1.09                                  | 5.22                                  |                                       |
| Diagnosis: NA                                                                                       | 2.79 (1.48)                 | -.15                                  | 5.70                                  |                                       |
| <b>Index of moderated mediation (difference between conditional indirect effects)</b>               |                             |                                       |                                       |                                       |
|                                                                                                     | <b>Indirect effect (SE)</b> | <b>LL (95%) CI<br/>(bootstrapped)</b> | <b>UL (95%) CI<br/>(bootstrapped)</b> |                                       |
| Diagnosis                                                                                           | .24 (1.84)                  | -3.39                                 | 3.87                                  |                                       |

| <b>Role change/disruption stressors</b> |                                                               |                                  |
|-----------------------------------------|---------------------------------------------------------------|----------------------------------|
|                                         | <b>Relation to perceived stressor severity<br/>(mediator)</b> | <b>Relation to mental health</b> |
|                                         |                                                               |                                  |

|                                                    | <i>b (SE)</i>                             | <i>t</i> | <i>p</i> | <i>b (SE)</i> | <i>t</i> | <i>p</i> |
|----------------------------------------------------|-------------------------------------------|----------|----------|---------------|----------|----------|
| Stressor exposure                                  | 2.14 (.11)                                | 18.83    | < .001   |               |          |          |
| Diagnosis (moderator)                              | 4.92 (1.01)                               | 4.87     | < .001   |               |          |          |
| Interaction term 1 (Stressor exposure x diagnosis) | -.51 (.13)                                | -3.95    | .0001    |               |          |          |
| Sex (covariate)                                    | .87 (.67)                                 | 1.31     | NS       |               |          |          |
| Current relationship (covariate)                   | -1.25 (.68)                               | -1.86    | .0647    |               |          |          |
| Model                                              | $R^2 = .86, F(5, 221) = 271.68, p < .001$ |          |          |               |          |          |
| Stressor exposure                                  |                                           |          |          | -.49 (.31)    | -1.58    | NS       |
| Perceived stressor severity (mediator)             |                                           |          |          | .53 (.13)     | 3.96     | .0001    |
| Diagnosis (moderator)                              |                                           |          |          | 5.75 (1.28)   | 4.50     | < .001   |
| Interaction term 1 (Stressor exposure x diagnosis) |                                           |          |          | .07 (.35)     | .19      | NS       |
| Interaction term 2                                 |                                           |          |          | -.18 (.16)    | -1.17    | NS       |

|                                                                                                                 |                             |                                          |                                   |                                   |
|-----------------------------------------------------------------------------------------------------------------|-----------------------------|------------------------------------------|-----------------------------------|-----------------------------------|
| (Perceived stressor severity x diagnosis)                                                                       |                             |                                          |                                   |                                   |
| Sex (covariate)                                                                                                 |                             | .76 (.72)                                | 1.06                              | NS                                |
| Current relationship (covariate)                                                                                |                             | 1.42 (.73)                               | 1.95                              | .0523                             |
| Model                                                                                                           |                             | $R^2 = .39, F(7, 219) = 20.31, p < .001$ |                                   |                                   |
| <b>Conditional direct effects of role change/disruption stressor exposure on mental health</b>                  |                             |                                          |                                   |                                   |
|                                                                                                                 | <b>Direct effect (SE)</b>   | <b><i>p</i></b>                          | <b>LL (95%) CI (bootstrapped)</b> | <b>UL (95%) CI (bootstrapped)</b> |
| Diagnosis: AU                                                                                                   | -.43 (.15)                  | .0060                                    | -.73                              | -.12                              |
| Diagnosis: NA                                                                                                   | -.49 (.31)                  | NS                                       | -1.10                             | .12                               |
| <b>Conditional indirect effects of role change/disruption stressor exposure on mental health - by moderator</b> |                             |                                          |                                   |                                   |
|                                                                                                                 | <b>Indirect effect (SE)</b> | <b>LL (95%) CI (bootstrapped)</b>        | <b>UL (95%) CI (bootstrapped)</b> |                                   |
| Diagnosis: AU                                                                                                   | .56 (.13)                   | .32                                      | .82                               |                                   |
| Diagnosis: NA                                                                                                   | 1.13 (.28)                  | .62                                      | 1.74                              |                                   |
| <b>Index of moderated mediation (difference between conditional indirect effects)</b>                           |                             |                                          |                                   |                                   |
|                                                                                                                 | <b>Indirect effect (SE)</b> | <b>LL (95%) CI (bootstrapped)</b>        | <b>UL (95%) CI (bootstrapped)</b> |                                   |

|           |            |       |     |
|-----------|------------|-------|-----|
| Diagnosis | -.57 (.31) | -1.21 | .00 |
|-----------|------------|-------|-----|

Supplementary item 6: Moderating effects of loneliness and social support on the association between total stressor exposure and perceived stressor severity

Covariates: sex, current relationship status

| <b>Model 1: Diagnosis and loneliness as moderators</b>          |                                           |          |          |
|-----------------------------------------------------------------|-------------------------------------------|----------|----------|
| Model                                                           | $R^2 = .91, F(7, 219) = 308.14, p < .001$ |          |          |
|                                                                 | <i>b (SE)</i>                             | <i>t</i> | <i>p</i> |
| Total stressor exposure                                         | 2.17 (.14)                                | 15.53    | < .001   |
| Diagnosis (moderator)                                           | 2.28 (4.57)                               | .50      | NS       |
| Interaction term 1<br>(Total stressor exposure x<br>diagnosis)  | .03 (.15)                                 | .23      | NS       |
| Loneliness                                                      | .39 (.14)                                 | 2.84     | .0049    |
| Interaction term 2<br>(Total stressor exposure x<br>loneliness) | -.01 (.00)                                | -1.39    | NS       |
| Sex (covariate)                                                 | 5.55 (1.87)                               | 2.96     | .0034    |

|                                                                     |                                                  |                 |                 |
|---------------------------------------------------------------------|--------------------------------------------------|-----------------|-----------------|
| Current relationship (covariate)                                    | -4.16 (1.92)                                     | -2.17           | .0314           |
| Combined moderation effect                                          | $R^2$ change: .00, $F(2, 219) = 1.27$ , $p = NS$ |                 |                 |
| <b>Model 2: Diagnosis and appraisal support as moderators</b>       |                                                  |                 |                 |
| Model                                                               | $R^2 = .91$ , $F(7, 219) = 307.15$ , $p < .001$  |                 |                 |
|                                                                     | <b><i>b (SE)</i></b>                             | <b><i>t</i></b> | <b><i>p</i></b> |
| Total stressor exposure                                             | 1.68 (.16)                                       | 10.22           | < .001          |
| Diagnosis (moderator)                                               | 4.93 (3.88)                                      | 1.27            | NS              |
| Interaction term 1<br>(Total stressor exposure x diagnosis)         | -.01 (.13)                                       | -.06            | NS              |
| Appraisal support                                                   | -1.69 (.64)                                      | -2.66           | .0084           |
| Interaction term 2<br>(Total stressor exposure x appraisal support) | .06 (.02)                                        | 3.26            | .0013           |
| Sex (covariate)                                                     | 5.52 (1.86)                                      | 2.96            | .0034           |



|                                                                  |                                                  |                      |                 |                 |             |
|------------------------------------------------------------------|--------------------------------------------------|----------------------|-----------------|-----------------|-------------|
| Current relationship (covariate)                                 |                                                  | -2.42 (1.93)         | -1.26           | .2104           |             |
| Combined moderation effect                                       | $R^2$ change: .01, $F(2, 219) = 6.20, p = .0024$ |                      |                 |                 |             |
| <i>Conditional effects at different levels of the moderators</i> |                                                  |                      |                 |                 |             |
| <b>Diagnosis</b>                                                 | <b>Appraisal support scores</b>                  | <b><i>b (SE)</i></b> | <b><i>p</i></b> | <b>LLCI</b>     | <b>ULCI</b> |
| AU                                                               | 4 (1 <sup>st</sup> tertile)                      | 1.95 (.06)           | < .001          | 1.82            | 2.08        |
| AU                                                               | 7 (2 <sup>nd</sup> tertile)                      | 2.10 (.07)           | < .001          | 1.96            | 2.23        |
| AU                                                               | 11 (3 <sup>rd</sup> tertile)                     | 2.33 (.12)           | < .001          | 2.09            | 2.56        |
| NA                                                               | 4 (1 <sup>st</sup> tertile)                      | 1.96 (.12)           | < .001          | 1.72            | 2.19        |
| NA                                                               | 7 (2 <sup>nd</sup> tertile)                      | 2.10 (.10)           | < .001          | 1.90            | 2.31        |
| NA                                                               | 11 (3 <sup>rd</sup> tertile)                     | 2.33 (.12)           | < .001          | 2.10            | 2.56        |
| <b>Model 3: Diagnosis and belonging support as moderators</b>    |                                                  |                      |                 |                 |             |
| Model                                                            | $R^2 = .91, F(7, 219) = 303.57, p < .001$        |                      |                 |                 |             |
|                                                                  |                                                  | <b><i>b (SE)</i></b> | <b><i>t</i></b> | <b><i>p</i></b> |             |
| Total stressor exposure                                          |                                                  | 1.88 (.16)           | 11.70           | < .001          |             |

|                                                                        |                                                     |                      |                 |             |             |
|------------------------------------------------------------------------|-----------------------------------------------------|----------------------|-----------------|-------------|-------------|
| Diagnosis (moderator)                                                  | 4.35 (4.13)                                         | 1.06                 | NS              |             |             |
| Interaction term 1<br>(Total stressor exposure x<br>diagnosis)         | .03 (.14)                                           | .19                  | NS              |             |             |
| Belonging support                                                      | -1.61 (.56)                                         | -2.86                | .0047           |             |             |
| Interaction term 2<br>(Total stressor exposure x<br>belonging support) | .03 (.02)                                           | 2.18                 | .0302           |             |             |
| Sex (covariate)                                                        | 5.51 (1.87)                                         | 2.94                 | .0036           |             |             |
| Current relationship<br>(covariate)                                    | -4.12 (1.99)                                        | -2.06                | .0407           |             |             |
| Combined moderation effect                                             | $R^2$ change: .00, $F(2, 219) = 3.16$ , $p = .0444$ |                      |                 |             |             |
| <i>Conditional effects at different levels of the moderators</i>       |                                                     |                      |                 |             |             |
| <b>Diagnosis</b>                                                       | <b>Belonging<br/>support scores</b>                 | <b><i>b (SE)</i></b> | <b><i>p</i></b> | <b>LLCI</b> | <b>ULCI</b> |
| AU                                                                     | 2 (1 <sup>st</sup> tertile)                         | 1.92 (.07)           | < .001          | 1.78        | 2.05        |
| AU                                                                     | 6 (2 <sup>nd</sup> tertile)                         | 2.05 (.07)           | < .001          | 1.90        | 2.19        |
| AU                                                                     | 9 (3 <sup>rd</sup> tertile)                         | 2.15 (.10)           | < .001          | 1.94        | 2.35        |
| NA                                                                     | 2 (1 <sup>st</sup> tertile)                         | 1.89 (.15)           | < .001          | 1.60        | 2.18        |

|    |                             |            |        |      |      |
|----|-----------------------------|------------|--------|------|------|
| NA | 6 (2 <sup>nd</sup> tertile) | 2.02 (.11) | < .001 | 1.80 | 2.24 |
| NA | 9 (3 <sup>rd</sup> tertile) | 2.12 (.10) | < .001 | 1.92 | 2.32 |

**Model 4: Diagnosis and tangible support as moderators**

| Model                                                                 | $R^2 = .91, F(7, 219) = 360.43, p < .001$ |          |          |  |
|-----------------------------------------------------------------------|-------------------------------------------|----------|----------|--|
|                                                                       | <i>b (SE)</i>                             | <i>t</i> | <i>p</i> |  |
| Total stressor exposure                                               | 1.69 (.19)                                | 9.01     | < .001   |  |
| Diagnosis (moderator)                                                 | 4.23 (4.01)                               | 1.06     | NS       |  |
| Interaction term 1<br>(Total stressor exposure x<br>diagnosis)        | .04 (.14)                                 | .33      | NS       |  |
| Tangible support                                                      | -1.69 (.62)                               | -2.73    | .0069    |  |
| Interaction term 2<br>(Total stressor exposure x<br>tangible support) | .05 (.02)                                 | 2.87     | .0045    |  |
| Sex (covariate)                                                       | 5.74 (1.87)                               | 3.06     | .0025    |  |
| Current relationship<br>(covariate)                                   | -2.83 (1.96)                              | -1.44    | .1506    |  |

| Combined moderation effect                                       | $R^2$ change: .00, $F(2, 219) = 4.98, p = .0076$ |                      |                 |             |             |
|------------------------------------------------------------------|--------------------------------------------------|----------------------|-----------------|-------------|-------------|
| <i>Conditional effects at different levels of the moderators</i> |                                                  |                      |                 |             |             |
| <b>Diagnosis</b>                                                 | <b>Tangible support scores</b>                   | <b><i>b</i> (SE)</b> | <b><i>p</i></b> | <b>LLCI</b> | <b>ULCI</b> |
| AU                                                               | 4 (1 <sup>st</sup> tertile)                      | 1.92 (.07)           | < .001          | 1.78        | 2.05        |
| AU                                                               | 7 (2 <sup>nd</sup> tertile)                      | 2.11 (.08)           | < .001          | 1.96        | 2.26        |
| AU                                                               | 10 (3 <sup>rd</sup> tertile)                     | 2.27 (.12)           | < .001          | 2.04        | 2.50        |
| NA                                                               | 4 (1 <sup>st</sup> tertile)                      | 1.87 (.14)           | < .001          | 1.60        | 2.15        |
| NA                                                               | 7 (2 <sup>nd</sup> tertile)                      | 2.06 (.11)           | < .001          | 1.85        | 2.27        |
| NA                                                               | 10 (3 <sup>rd</sup> tertile)                     | 2.22 (.11)           | < .001          | 2.01        | 2.43        |

Supplementary item 7: Moderating effects of loneliness and social support on the association between perceived stressor severity and physical health

Covariates: sex and current relationship status

| <b>Model 1: Diagnosis and loneliness as moderators</b>           |                                          |          |          |
|------------------------------------------------------------------|------------------------------------------|----------|----------|
| Model                                                            | $R^2 = .27, F(7, 219) = 11.65, p < .001$ |          |          |
|                                                                  | <i>b (SE)</i>                            | <i>t</i> | <i>p</i> |
| Perceived stressor severity                                      | .16 (.05)                                | 2.91     | .0040    |
| Diagnosis (moderator)                                            | 2.80 (4.43)                              | .63      | NS       |
| Interaction term 1<br>(Perceived stressor severity x diagnosis)  | -.05 (.06)                               | -.84     | NS       |
| Loneliness                                                       | .24 (.13)                                | 1.82     | .0705    |
| Interaction term 2<br>(Perceived stressor severity x loneliness) | -.00 (.00)                               | -.50     | NS       |
| Sex (covariate)                                                  | 6.08 (1.66)                              | 3.60     | .0004    |

|                                                                         |                                               |                 |                 |
|-------------------------------------------------------------------------|-----------------------------------------------|-----------------|-----------------|
| Current relationship (covariate)                                        | 1.36 (1.75)                                   | .78             | NS              |
| Combined moderation effect                                              | $R^2$ change: .01, $F(2, 219) = 1.16, p = NS$ |                 |                 |
| <b>Model 2: Diagnosis and appraisal support as moderators</b>           |                                               |                 |                 |
| Model                                                                   | $R^2 = .25, F(7, 219) = 10.54, p < .001$      |                 |                 |
|                                                                         | <b><i>b (SE)</i></b>                          | <b><i>t</i></b> | <b><i>p</i></b> |
| Perceived stressor severity                                             | .14 (.07)                                     | 1.90            | .0586           |
| Diagnosis (moderator)                                                   | 6.34 (3.86)                                   | 1.64            | NS              |
| Interaction term 1<br>(Perceived stressor severity x diagnosis)         | -.08 (.05)                                    | -1.52           | NS              |
| Appraisal support                                                       | -.28 (.62)                                    | -.46            | NS              |
| Interaction term 2<br>(Perceived stressor severity x appraisal support) | .01 (.01)                                     | .93             | NS              |
| Sex (covariate)                                                         | 5.85 (1.71)                                   | 3.43            | .0007           |

|                                                                         |                                                  |                 |                 |
|-------------------------------------------------------------------------|--------------------------------------------------|-----------------|-----------------|
| Current relationship (covariate)                                        | 2.68 (1.76)                                      | 1.52            | NS              |
| Combined moderation effect                                              | $R^2$ change: .02, $F(2, 219) = 2.47, p = .0871$ |                 |                 |
| <b>Model 3: Diagnosis and belonging support as moderators</b>           |                                                  |                 |                 |
| Model                                                                   | $R^2 = .25, F(7, 219) = 10.64, p < .001$         |                 |                 |
|                                                                         | <b><i>b</i> (SE)</b>                             | <b><i>t</i></b> | <b><i>p</i></b> |
| Perceived stressor severity                                             | .11 (.07)                                        | 1.70            | .0910           |
| Diagnosis (moderator)                                                   | 4.72 (3.82)                                      | 1.19            | NS              |
| Interaction term 1<br>(Perceived stressor severity x diagnosis)         | -.05 (.05)                                       | -.97            | NS              |
| Belonging support                                                       | -.62 (.54)                                       | -1.15           | NS              |
| Interaction term 2<br>(Perceived stressor severity x belonging support) | .01 (.01)                                        | 1.36            | NS              |
| Sex (covariate)                                                         | 5.95 (1.70)                                      | 3.50            | .0006           |
| Current relationship (covariate)                                        | 2.38 (1.83)                                      | 1.30            | NS              |

|                                                                        |                                                  |                 |                 |
|------------------------------------------------------------------------|--------------------------------------------------|-----------------|-----------------|
| Combined moderation effect                                             | $R^2$ change: .02, $F(2, 219) = 2.80, p = .0630$ |                 |                 |
| <b>Model 4: Diagnosis and tangible support as moderators</b>           |                                                  |                 |                 |
| Model                                                                  | $R^2 = .26, F(7, 219) = 10.77, p < .001$         |                 |                 |
|                                                                        | <b><i>b</i> (SE)</b>                             | <b><i>t</i></b> | <b><i>p</i></b> |
| Perceived stressor severity                                            | .08 (.08)                                        | 1.06            | NS              |
| Diagnosis (moderator)                                                  | 4.49 (3.89)                                      | 1.15            | NS              |
| Interaction term 1<br>(Perceived stressor severity x diagnosis)        | -.05 (.05)                                       | -.92            | NS              |
| Tangible support                                                       | -.80 (.60)                                       | -1.32           | NS              |
| Interaction term 2<br>(Perceived stressor severity x tangible support) | .01 (.01)                                        | 1.59            | NS              |
| Sex (covariate)                                                        | 5.91 (1.70)                                      | 3.47            | .0006           |
| Current relationship (covariate)                                       | 2.67 (1.79)                                      | 1.49            | NS              |



|                            |                                                  |
|----------------------------|--------------------------------------------------|
| Combined moderation effect | $R^2$ change: .02, $F(2, 219) = 3.16, p = .0445$ |
|----------------------------|--------------------------------------------------|

Supplementary item 8: Moderating effects of loneliness and social support on the association between perceived stressor severity and mental health

Covariates: sex and current relationship status

| <b>Model 1: Diagnosis and loneliness as moderators</b>              |                                          |          |          |
|---------------------------------------------------------------------|------------------------------------------|----------|----------|
| Model                                                               | $R^2 = .52, F(7, 219) = 34.31, p < .001$ |          |          |
|                                                                     | <i>b (SE)</i>                            | <i>t</i> | <i>p</i> |
| Perceived stressor severity                                         | .06 (.02)                                | 3.10     | .0022    |
| Diagnosis (moderator)                                               | 3.18 (1.67)                              | 1.90     | .0596    |
| Interaction term 1<br>(Perceived stressor severity x<br>diagnosis)  | -.04 (.05)                               | -1.83    | .0682    |
| Loneliness                                                          | .21 (.05)                                | 4.30     | < .001   |
| Interaction term 2<br>(Perceived stressor severity x<br>loneliness) | .00 (.00)                                | -.08     | NS       |
| Sex (covariate)                                                     | 1.09 (.64)                               | 1.71     | .0878    |

|                                                                  |                                                  |                      |                 |             |             |    |
|------------------------------------------------------------------|--------------------------------------------------|----------------------|-----------------|-------------|-------------|----|
| Current relationship (covariate)                                 |                                                  | .26 (.66)            |                 | .40         |             | NS |
| Combined moderation effect                                       | $R^2$ change: .01, $F(2, 219) = 2.80, p = .0629$ |                      |                 |             |             |    |
| <i>Conditional effects at different levels of the moderators</i> |                                                  |                      |                 |             |             |    |
| <b>Diagnosis</b>                                                 | <b>Loneliness scores</b>                         | <b><i>b (SE)</i></b> | <b><i>p</i></b> | <b>LLCI</b> | <b>ULCI</b> |    |
| AU                                                               | 11 (1 <sup>st</sup> tertile)                     | .02 (.02)            | NS              | -.02        | .06         |    |
| AU                                                               | 32 (2 <sup>nd</sup> tertile)                     | .02 (.01)            | .0838           | -.00        | .04         |    |
| AU                                                               | 45 (3 <sup>rd</sup> tertile)                     | .02 (.01)            | .0562           | -.00        | .04         |    |
| NA                                                               | 11 (1 <sup>st</sup> tertile)                     | .06 (.02)            | .0003           | .03         | .10         |    |
| NA                                                               | 32 (2 <sup>nd</sup> tertile)                     | .06 (.02)            | .0005           | .03         | .10         |    |
| NA                                                               | 45 (3 <sup>rd</sup> tertile)                     | .06 (.02)            | .0073           | .02         | .11         |    |
| <b>Model 2: Diagnosis and appraisal support as moderators</b>    |                                                  |                      |                 |             |             |    |

| Model                                                                      | $R^2 = .41, F(7, 219) = 21.42, p < .001$         |                      |                 |             |             |
|----------------------------------------------------------------------------|--------------------------------------------------|----------------------|-----------------|-------------|-------------|
|                                                                            | <i>b (SE)</i>                                    | <i>t</i>             | <i>p</i>        |             |             |
| Perceived stressor severity                                                | .11 (.03)                                        | 3.58                 | .0004           |             |             |
| Diagnosis (moderator)                                                      | 6.37 (1.61)                                      | 3.97                 | .0001           |             |             |
| Interaction term 1<br>(Perceived stressor severity x<br>diagnosis)         | -.06 (.02)                                       | -3.02                | .0028           |             |             |
| Appraisal support                                                          | -.28 (.26)                                       | -1.08                | NS              |             |             |
| Interaction term 2<br>(Perceived stressor severity x<br>appraisal support) | -.00 (.00)                                       | -.38                 | NS              |             |             |
| Sex (covariate)                                                            | .91 (.71)                                        | 1.28                 | NS              |             |             |
| Current relationship<br>(covariate)                                        | .97 (.73)                                        | 1.33                 | NS              |             |             |
| Combined moderation effect                                                 | $R^2$ change: .03, $F(2, 219) = 4.90, p = .0083$ |                      |                 |             |             |
| <i>Conditional effects at different levels of the moderators</i>           |                                                  |                      |                 |             |             |
| <b>Diagnosis</b>                                                           | <b>Appraisal<br/>support scores</b>              | <b><i>b (SE)</i></b> | <b><i>p</i></b> | <b>LLCI</b> | <b>ULCI</b> |

|    |                              |           |        |      |     |
|----|------------------------------|-----------|--------|------|-----|
| AU | 4 (1 <sup>st</sup> tertile)  | .04 (.01) | .0013  | .02  | .06 |
| AU | 7 (2 <sup>nd</sup> tertile)  | .04 (.01) | .0027  | .01  | .06 |
| AU | 11 (3 <sup>rd</sup> tertile) | .03 (.02) | NS     | -.01 | .07 |
| NA | 4 (1 <sup>st</sup> tertile)  | .10 (.02) | < .001 | .06  | .14 |
| NA | 7 (2 <sup>nd</sup> tertile)  | .10 (.02) | < .001 | .06  | .13 |
| NA | 11 (3 <sup>rd</sup> tertile) | .09 (.02) | < .001 | .06  | .13 |

**Model 3: Diagnosis and belonging support as moderators**

|                                                                    |                                          |          |          |  |
|--------------------------------------------------------------------|------------------------------------------|----------|----------|--|
| Model                                                              | $R^2 = .43, F(7, 219) = 23.23, p < .001$ |          |          |  |
|                                                                    | <i>b (SE)</i>                            | <i>t</i> | <i>p</i> |  |
| Perceived stressor severity                                        | .10 (.03)                                | 3.72     | .0003    |  |
| Diagnosis (moderator)                                              | 6.21 (1.62)                              | 3.82     | .0002    |  |
| Interaction term 1<br>(Perceived stressor severity x<br>diagnosis) | -.07 (.02)                               | -2.92    | .0038    |  |
| Belonging support                                                  | -.43 (.22)                               | -1.95    | .0525    |  |
| Interaction term 2                                                 | -.00 (.00)                               | -.27     | NS       |  |

|                                                                  |                                                  |                      |                 |             |             |
|------------------------------------------------------------------|--------------------------------------------------|----------------------|-----------------|-------------|-------------|
| (Perceived stressor severity x belonging support)                |                                                  |                      |                 |             |             |
| Sex (covariate)                                                  |                                                  | .74 (.70)            |                 | 1.06        | NS          |
| Current relationship (covariate)                                 |                                                  | .40 (.75)            |                 | .53         | NS          |
| Combined moderation effect                                       | $R^2$ change: .03, $F(2, 219) = 5.30, p = .0056$ |                      |                 |             |             |
| <i>Conditional effects at different levels of the moderators</i> |                                                  |                      |                 |             |             |
| <b>Diagnosis</b>                                                 | <b>Belonging support scores</b>                  | <b><i>b</i> (SE)</b> | <b><i>p</i></b> | <b>LLCI</b> | <b>ULCI</b> |
| AU                                                               | 2 (1 <sup>st</sup> tertile)                      | .03 (.01)            | .0055           | .01         | .06         |
| AU                                                               | 6 (2 <sup>nd</sup> tertile)                      | .03 (.01)            | .0100           | .01         | .05         |
| AU                                                               | 9 (3 <sup>rd</sup> tertile)                      | .03 (.02)            | .0769           | -.00        | .06         |
| NA                                                               | 2 (1 <sup>st</sup> tertile)                      | .10 (.02)            | < .001          | .05         | .14         |
| NA                                                               | 6 (2 <sup>nd</sup> tertile)                      | .10 (.02)            | < .001          | .06         | .13         |
| NA                                                               | 9 (3 <sup>rd</sup> tertile)                      | .09 (.02)            | < .001          | .06         | .13         |
| <b>Model 4: Diagnosis and tangible support as moderators</b>     |                                                  |                      |                 |             |             |
| Model                                                            | $R^2 = .42, F(7, 219) = 23.07, p < .001$         |                      |                 |             |             |

|                                                                        | <i>b (SE)</i>                                    | <i>t</i>             | <i>p</i>        |             |             |
|------------------------------------------------------------------------|--------------------------------------------------|----------------------|-----------------|-------------|-------------|
| Perceived stressor stress                                              | .11 (.03)                                        | 3.57                 | .0004           |             |             |
| Diagnosis (moderator)                                                  | 6.76 (1.60)                                      | 4.23                 | < .001          |             |             |
| Interaction term 1<br>(Perceived stressor severity x diagnosis)        | -.07 (.02)                                       | -3.33                | .0010           |             |             |
| Tangible support                                                       | -.37 (.25)                                       | -1.49                | NS              |             |             |
| Interaction term 2<br>(Perceived stressor severity x tangible support) | -.00 (.00)                                       | -.54                 | NS              |             |             |
| Sex (covariate)                                                        | 1.02 (.70)                                       | 1.45                 | NS              |             |             |
| Current relationship (covariate)                                       | .64 (.73)                                        | .87                  | NS              |             |             |
| Combined moderation effect                                             | $R^2$ change: .03, $F(2, 219) = 6.35, p = .0021$ |                      |                 |             |             |
| <i>Conditional effects at different levels of the moderators</i>       |                                                  |                      |                 |             |             |
| <b>Diagnosis</b>                                                       | <b>Tangible support scores</b>                   | <b><i>b (SE)</i></b> | <b><i>p</i></b> | <b>LLCI</b> | <b>ULCI</b> |
| AU                                                                     | 4 (1 <sup>st</sup> tertile)                      | .03 (.01)            | .0081           | .01         | .06         |

|    |                              |           |       |      |     |
|----|------------------------------|-----------|-------|------|-----|
| AU | 7 (2 <sup>nd</sup> tertile)  | .03 (.01) | .0321 | .00  | .05 |
| AU | 10 (3 <sup>rd</sup> tertile) | .02 (.02) | NS    | -.01 | .06 |
| NA | 4 (1 <sup>st</sup> tertile)  | .10 (.02) | <.001 | .06  | .15 |
| NA | 7 (2 <sup>nd</sup> tertile)  | .10 (.02) | <.001 | .07  | .13 |
| NA | 10 (3 <sup>rd</sup> tertile) | .10 (.02) | <.001 | .06  | .13 |



Supplementary item 9: Post-hoc mediation analysis of loneliness, appraisal, belonging and tangible support on the association between diagnosis and mental health

|                                  | Relation to<br>loneliness (mediator)               |          |          | Relation to<br>appraisal support (mediator)        |          |          | Relation to<br>Belonging support (mediator)        |          |          |
|----------------------------------|----------------------------------------------------|----------|----------|----------------------------------------------------|----------|----------|----------------------------------------------------|----------|----------|
|                                  | <i>b (SE)</i>                                      | <i>t</i> | <i>p</i> | <i>b (SE)</i>                                      | <i>t</i> | <i>p</i> | <i>b (SE)</i>                                      | <i>t</i> | <i>p</i> |
| Diagnosis                        | 16.58 (1.77)                                       | 9.35     | < .001   | -2.14 (.39)                                        | -5.55    | < .001   | -2.36 (.40)                                        | -5.91    | < .001   |
| Sex (covariate)                  | -.97 (1.83)                                        | -1.81    | NS       | .32 (.39)                                          | .81      | NS       | -.16 (.41)                                         | -.38     | NS       |
| Current relationship (covariate) | 3.61 (1.83)                                        | 1.97     | .0497    | -.81 (.40)                                         | -2.04    | .0422    | -1.75 (.41)                                        | -4.25    | < .001   |
| Model                            | R <sup>2</sup> = .33, F (3, 233) = 50.36, p < .001 |          |          | R <sup>2</sup> = .16, F (3, 233) = 14.61, p < .001 |          |          | R <sup>2</sup> = .24, F (3, 233) = 23.85, p < .001 |          |          |
|                                  | Relation to tangible support (mediator)            |          |          |                                                    |          |          |                                                    |          |          |
|                                  | <i>b (SE)</i>                                      | <i>t</i> | <i>p</i> |                                                    |          |          |                                                    |          |          |
| Diagnosis                        | -2.32 (.87)                                        | -5.98    | < .001   |                                                    |          |          |                                                    |          |          |
| Sex (covariate)                  | .42 (.40)                                          | 1.05     | NS       |                                                    |          |          |                                                    |          |          |

|                                  |                                                    |                 |                 |                 |                 |
|----------------------------------|----------------------------------------------------|-----------------|-----------------|-----------------|-----------------|
| Current relationship (covariate) | -1.15 (.40)                                        | -2.87           | .0045           |                 |                 |
| Model                            | R <sup>2</sup> = .20, F (3, 233) = 18.96, p < .001 |                 |                 |                 |                 |
|                                  | <b>Relation to mental health</b>                   |                 |                 |                 |                 |
|                                  | <b><i>b (SE)</i></b>                               | <b><i>t</i></b> | <b><i>p</i></b> |                 |                 |
| Diagnosis                        | 1.24 (.75)                                         | 1.64            | .1030           |                 |                 |
| Loneliness                       | .27 (.03)                                          | 7.97            | < .001          |                 |                 |
| Appraisal support                | .23 (.15)                                          | 1.52            | NS              |                 |                 |
| Belonging support                | .05 (.16)                                          | .32             | NS              |                 |                 |
| Tangible support                 | -.24 (.16)                                         | -1.53           | NS              |                 |                 |
| Sex (covariate)                  | 1.31 (.66)                                         | 1.99            | .0474           |                 |                 |
| Current relationship (covariate) | -.35 (.68)                                         | -.51            | NS              |                 |                 |
| Model                            | R <sup>2</sup> = .49, F (7, 219) = 30.44, p < .001 |                 |                 |                 |                 |
| <b><i>b (SE)</i></b>             |                                                    |                 |                 | <b><i>t</i></b> | <b><i>p</i></b> |
|                                  |                                                    |                 |                 | <b>LLCI</b>     | <b>ULCI</b>     |

|                                                               |            |      |        |       |      |
|---------------------------------------------------------------|------------|------|--------|-------|------|
| Total effect of diagnosis on mental health                    | 5.61 (.78) | 7.16 | < .001 | 4.07  | 7.16 |
| Direct effect of diagnosis on mental health                   | 1.24 (.75) | 1.64 | .1030  | -.25  | 2.72 |
| Indirect effect of diagnosis via loneliness (mediator)        | 4.44 (.70) |      |        | 3.14  | 5.87 |
| Indirect effect of diagnosis via appraisal support (mediator) | -.49 (.35) |      |        | -1.24 | .16  |
| Indirect effect of diagnosis via belonging support (mediator) | -.12 (.38) |      |        | -.91  | .60  |
| Indirect effect of diagnosis via tangible support (mediator)  | .55 (.37)  |      |        | -.13  | 1.33 |
